# Supplementary material for: A Model In Vitro Study Using Hypericin: Tumor-Versus Necrosis-Targeting Property and Possible Mechanisms
Source: MDPI journal article supplement (doi:10.3390/biology9010013), 2020-01-07
Supplement: s1 [file s1]

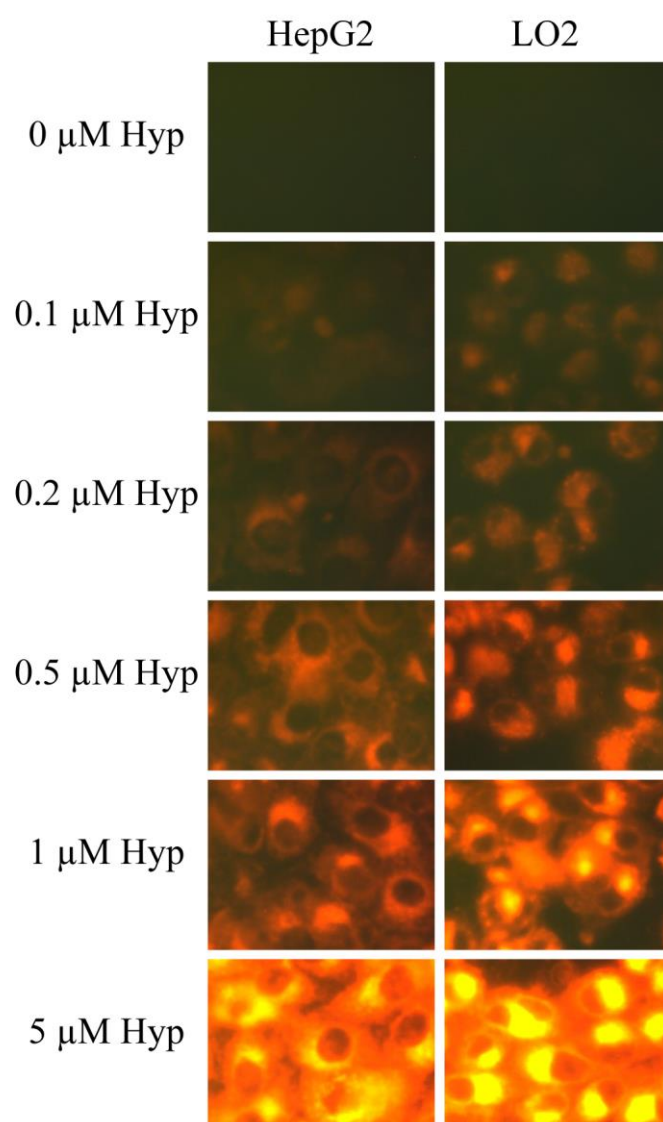

**Figure S1.** The fluorescence image of Hyp in either LO2 or HepG2 cell line after incubation with different concentrations of Hyp for one hour.
